# Supplementary material for: The effects of warm-air intrusions in the high Arctic on cirrus clouds
Source: Copernicus journal article supplement (doi:10.5194/acp-24-5971-2024), 2024-05-24
Supplement: Supplementary file 1 [file acp-24-5971-2024-supplement.pdf]

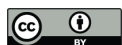

*Supplement of*

## **The effects of warm-air intrusions in the high Arctic on cirrus clouds**

**Georgios Dekoutsidis et al.**

*Correspondence to:* Georgios Dekoutsidis ([georgios.dekoutsidis@dlr.de](mailto:georgios.dekoutsidis@dlr.de))

The copyright of individual parts of the supplement might differ from the article licence.

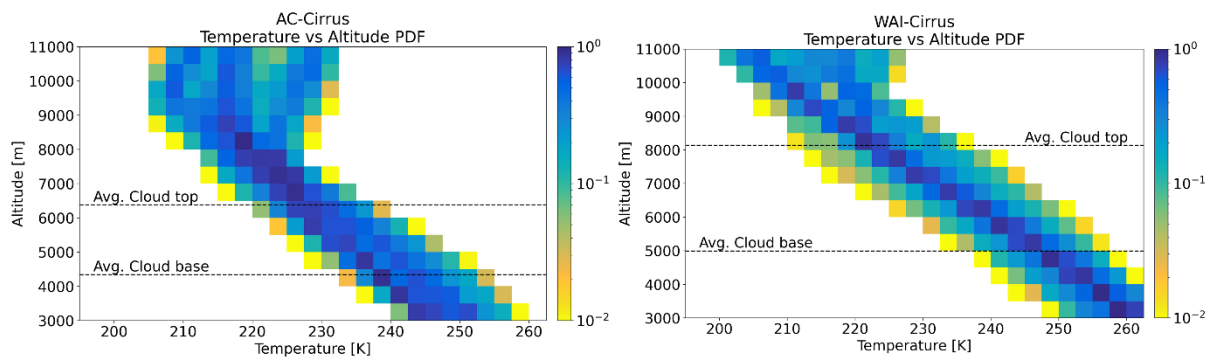

Figure S1: Probability density function of ambient temperature with respect to altitude for AC Cirrus group (Left) and WAI Cirrus group (Right). Also plotted are the respective average cloud base and cloud top heights for each group. Noticeable are the higher altitude of the thermal tropopause under WAI conditions and the generally warmer conditions especially at lower altitudes. Temperature data from ECMWF IFS.
